# Supplementary material
Source: Springer Nature journal article supplement (https://www.springermedizin.de/resource/supplementary/12882_2014_784_MOESM2_ESM.pdf/9454712)

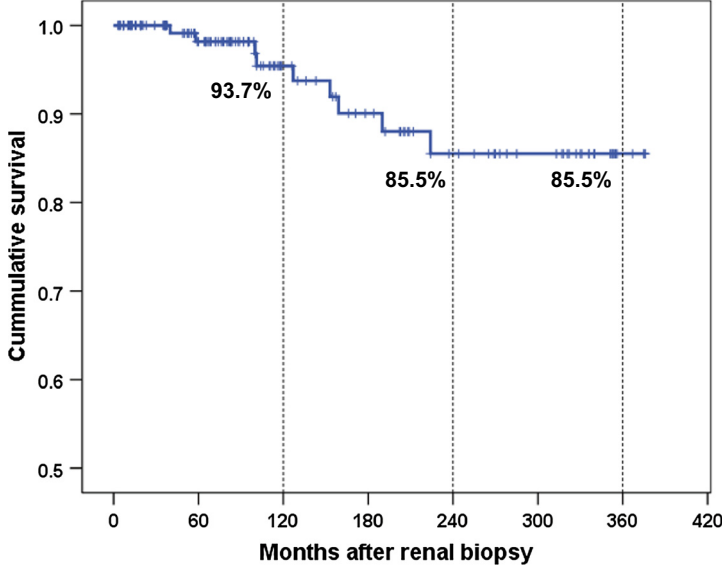

No at risk

152

101

58

45

32

24

4

Supplement: MOESM2 [file 9454712]
